# Supplementary material for: The effects of acceptance and commitment therapy on eating behavior and diet delivered through face-to-face contact and a mobile app: a randomized controlled trial
Source: PubMed Central journal article supplement (PMC5828146; doi:10.1186/s12966-018-0654-8), 2018-02-27
Supplement: 12966_2018_654_MOESM2_ESM.pdf [file 12966_2018_654_MOESM2_ESM.pdf]

**Additional file 2: Table S2.** Standardized estimates (standard error) and p-values for moderated intervention effects.

| Moderator (baseline) | Outcome (from baseline to follow-up, $\Delta$ 36 weeks)              |                                |                                   |                            |                                  |                                  |
|----------------------|----------------------------------------------------------------------|--------------------------------|-----------------------------------|----------------------------|----------------------------------|----------------------------------|
| PSS                  | IES<br>Eating for<br>Physical<br>Rather Than<br>Emotional<br>Reasons | TFEQ<br>Uncontrolled<br>Eating | HTAS<br>Using Food as<br>a Reward | ecSI<br>Food<br>Acceptance | REBS<br>Integrated<br>regulation | REBS<br>Identified<br>regulation |
| Face-to-face         | -0.03 (0.10)<br>.798                                                 | 0.04 (0.09)<br>.659            | 0.04 (0.09)<br>.679               | -0.18 (0.10)<br>.082       | -0.09 (0.10)<br>.368             | -0.14 (0.12)<br>.245             |
| Mobile               | -0.03 (0.10)<br>.778                                                 | 0.06 (0.11)<br>.607            | -0.10 (0.09)<br>.277              | 0.05 (0.10)<br>.623        | 0.01 (0.11)<br>.930              | -0.09 (0.13)<br>.520             |

Notes: The ACT intervention groups (Face-to-face and Mobile) are compared separately to the Control group. PSS = Perceived Stress Scale; IES = Intuitive Eating Scale; TFEQ = The Three-Factor Eating Questionnaire-R18; HTAS = Health and Taste Attitude Scales; ecSI = preliminary Finnish translation of Satter Eating Competence Inventory 2.0; REBS = Regulation of Eating Behavior Scale.
